# Supplementary material for: Changes in metabolism-related RNA expression in circulating white blood cells of aged individual with physical frailty
Source: Aging (Albany NY). 2025 May 28;17(5):1206–20. doi: 10.18632/aging.206256 (PMC12151501; doi:10.18632/aging.206256)
Supplement: Supplementary Table 1 [file aging-17-206256-s001.xlsx]

## Sheet: Sheet1
Supplementary Table 1. Age and the answer of each enrolled patients to the health assessment questionnaire for the national screening program for older adults in Japan.
Enrolled No.	Age	Health condition	Mental health	Eating behavior	Oral function-1 Masticatory disturbance	Oral function-2 Swallowing dysfunction	Bodyweight loss	Physical function and falls-1 Slower walking speed	Physical function and falls-2 Experiencing a fall	Physical function and falls-3 Healthy habit of walking	Cognitive function-1 Being pointed out of memory loss	Cognitive function-2 Not knowing today’s date	Smoking	Social participation and support-1 Going out at least once a week	Social participation and support-2 Regular communications	Social participation and support-3 Anyone to reach out
1	74	Excellent	Satisfied	Yes	No	No	No	No	No	No	No	No	No	Yes	Yes	Yes
2	76	Excellent	Satisfied	Yes	Yes	Yes	No	No	No	No	No	No	No	Yes	Yes	Yes
3	71	Excellent	Satisfied	Yes	Yes	Yes	No	Yes	No	No	No	No	No	Yes	Yes	Yes
4	73	Fair	Satisfied	Yes	No	No	No	Yes	No	Yes	No	No	No	Yes	Yes	Yes
5	66	Fair	Moderately satisfied	Yes	No	No	No	No	No	No	No	No	No	Yes	Yes	Yes
6	71	Good	Moderately satisfied	Yes	No	No	No	No	No	Yes	No	No	No	Yes	Yes	Yes
7	70	Excellent	Moderately satisfied	Yes	Yes	No	No	No	No	Yes	Yes	No	No	Yes	Yes	Yes
8	93	Good	Moderately satisfied	Yes	Yes	No	No	No	No	Yes	Yes	No	No	Yes	Yes	Yes
9	90	Good	Satisfied	Yes	No	No	No	Yes	No	Yes	No	No	No	Yes	Yes	Yes
10	65	Fair	Moderately satisfied	Yes	No	No	No	No	No	Yes	No	No	No	Yes	Yes	Yes
11	79	Excellent	Satisfied	Yes	No	No	No	No	No	No	No	Yes	No	Yes	Yes	Yes
12	84	Fair	Moderately dissatisfied	Yes	Yes	Yes	No	Yes	Yes	No	Yes	Yes	No	No	Yes	Yes
13	86	Fair	Moderately satisfied	Yes	Yes	Yes	Yes	Yes	Yes	No	Yes	Yes	No	No	Yes	Yes
14	90	Fair	Moderately satisfied	Yes	Yes	Yes	Yes	Yes	Yes	No	Yes	Yes	No	Yes	Yes	Yes
15	74	Good	Dissatisfied	Yes	No	No	No	Yes	No	No	Yes	Yes	No	No	Yes	Yes
16	72	Good	Moderately satisfied	Yes	No	No	No	Yes	No	Yes	Yes	No	No	Yes	Yes	Yes
17	73	Poor	Moderately satisfied	Yes	No	No	No	Yes	No	Yes	Yes	No	No	Yes	Yes	Yes
18	79	Fair	Moderately dissatisfied	Yes	No	No	No	No	No	Yes	Yes	Yes	No	Yes	Yes	Yes
19	86	Fair	Moderately satisfied	Yes	Yes	Yes	No	Yes	No	No	No	Yes	No	No	Yes	Yes
20	90	Fair	Moderately satisfied	Yes	Yes	Yes	Yes	Yes	Yes	No	Yes	Yes	No	No	No	Yes
